# Supplementary material for: Structural analyses of carbon films deposited at different total mass rates in a hot-filament CVD system
Source: Royal Society of Chemistry journal article supplement (doi:10.1039/d3ma00555k), 2023-01-01
Supplement: d3ma00555k1.pdf [file d3ma00555k1.pdf]

## Electronic Supplementary Information:

### Structural analyses of carbon films deposited at different total mass rates in hot-filament CVD system

Mubarak Ali

Department of Physics, COMSATS University Islamabad, Islamabad Campus, 45550,  
Park Road, Pakistan, E-mail: [mubarak74@mail.com](mailto:mubarak74@mail.com), [mubarak60@hotmail.com](mailto:mubarak60@hotmail.com),

<http://orcid.org/0000-0003-1612-6014>

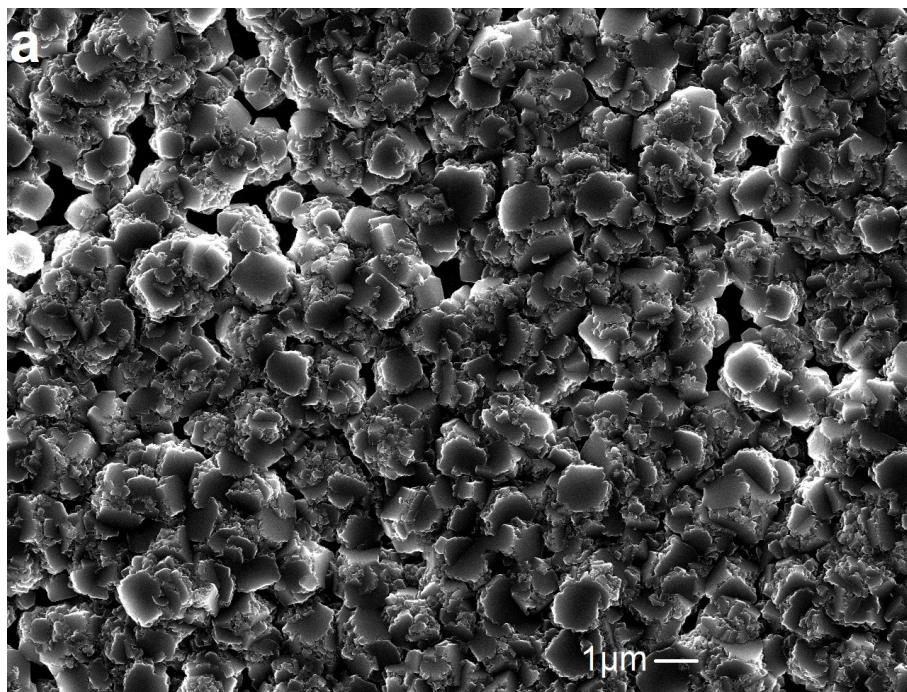

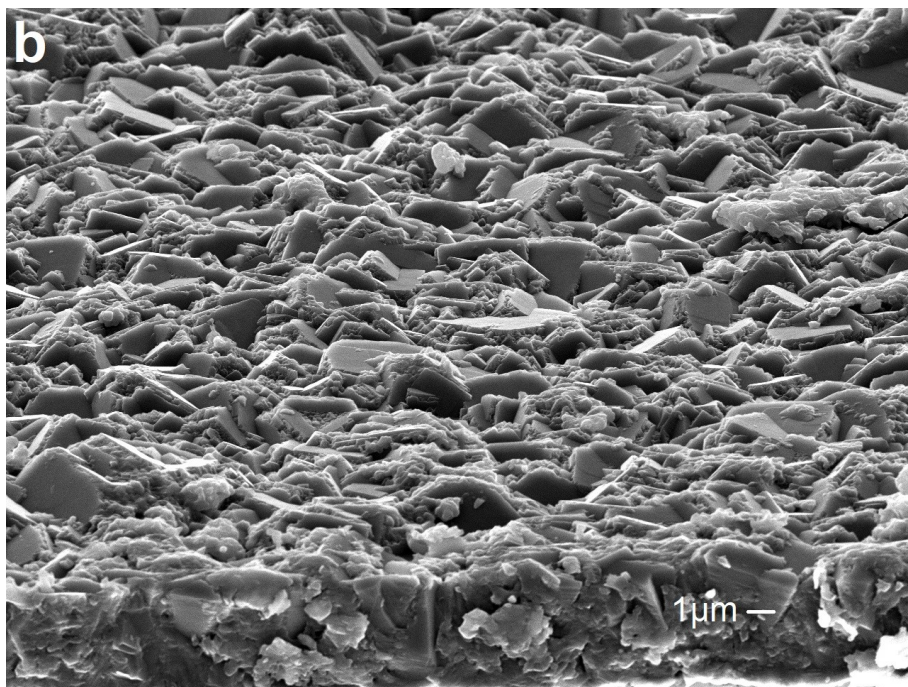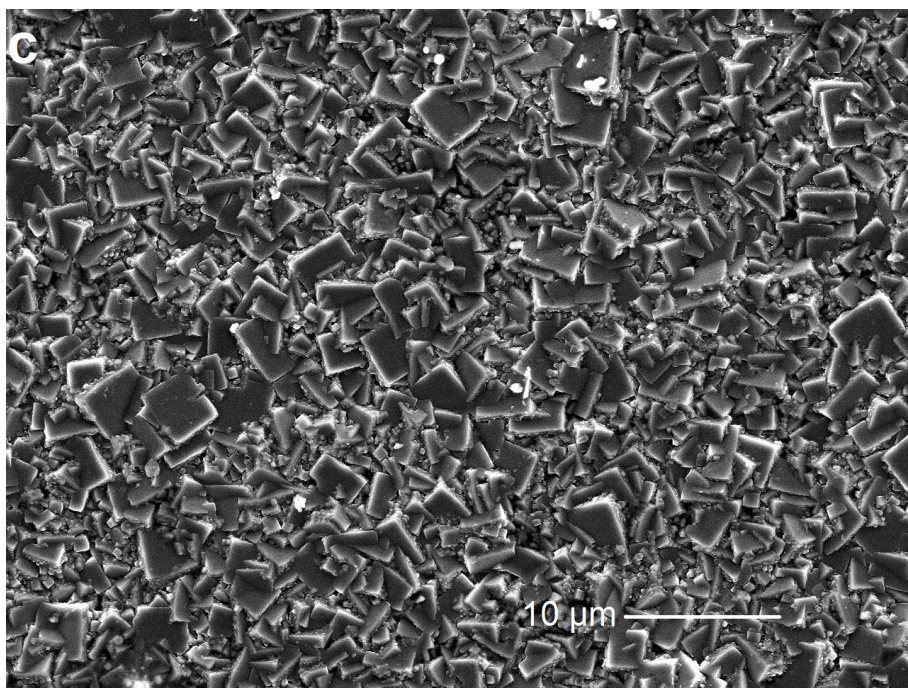

**Figure S1:** Low-magnification microscopic images of the carbon films deposited at different total mass flow rates (a) 200 sccm, (b) 300 sccm, and (c) 400 sccm



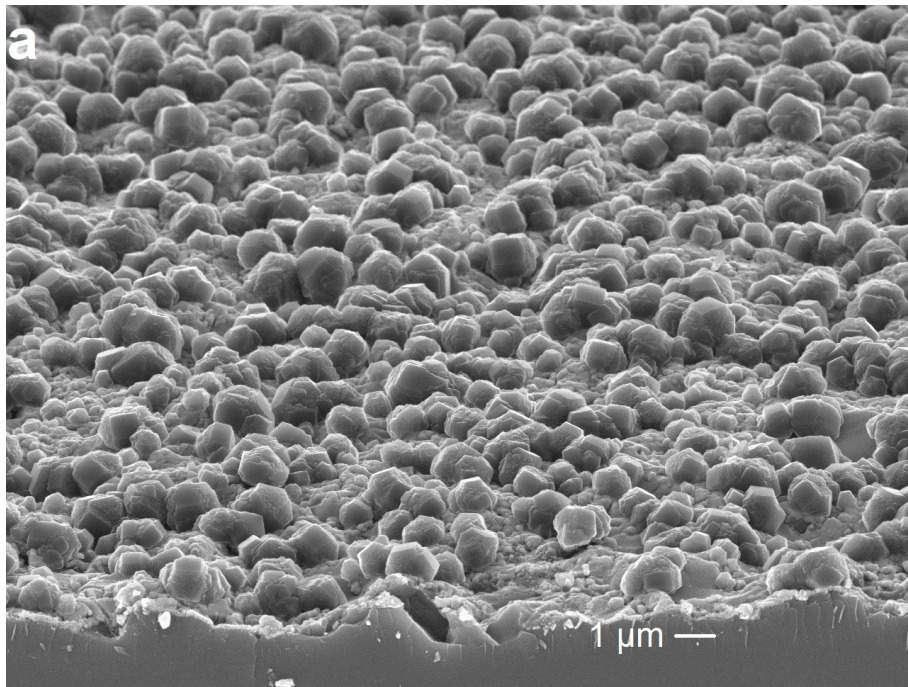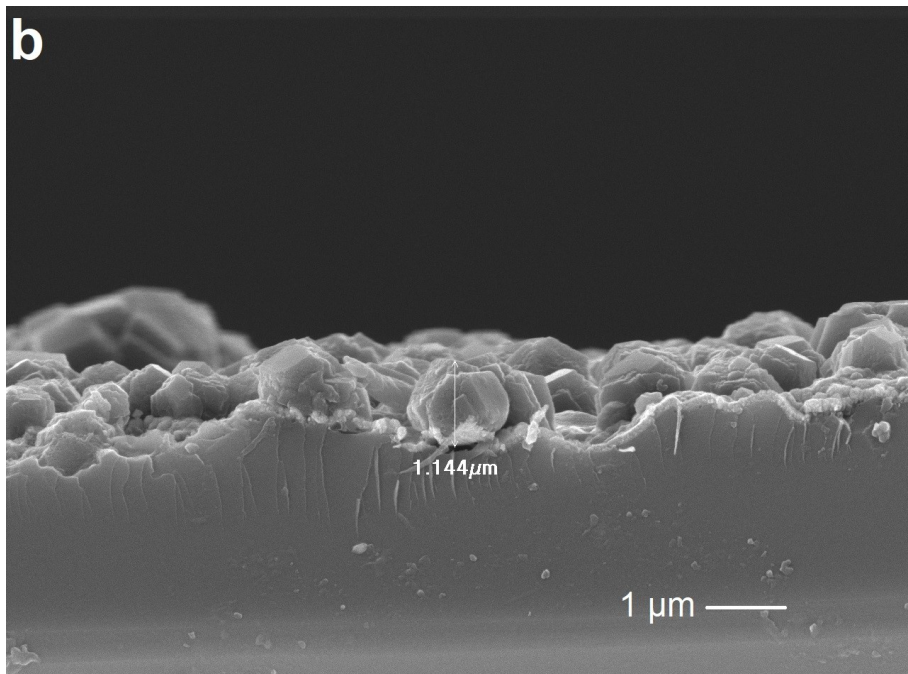

**Figure S2:** (a) surface and (b) fractured cross-sectional images of the carbon film deposited at 100 sccm total mass flow rate

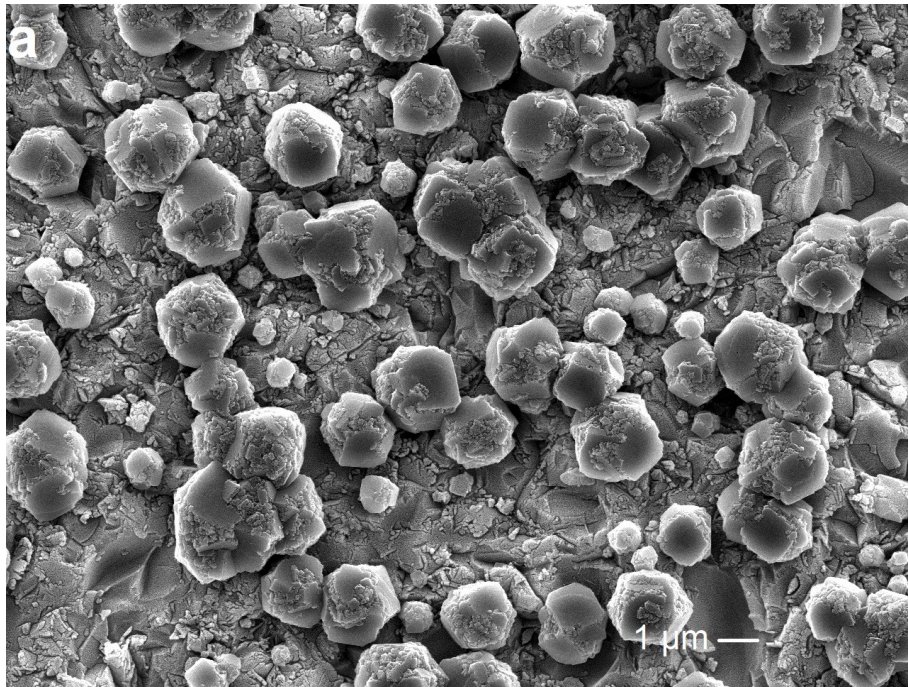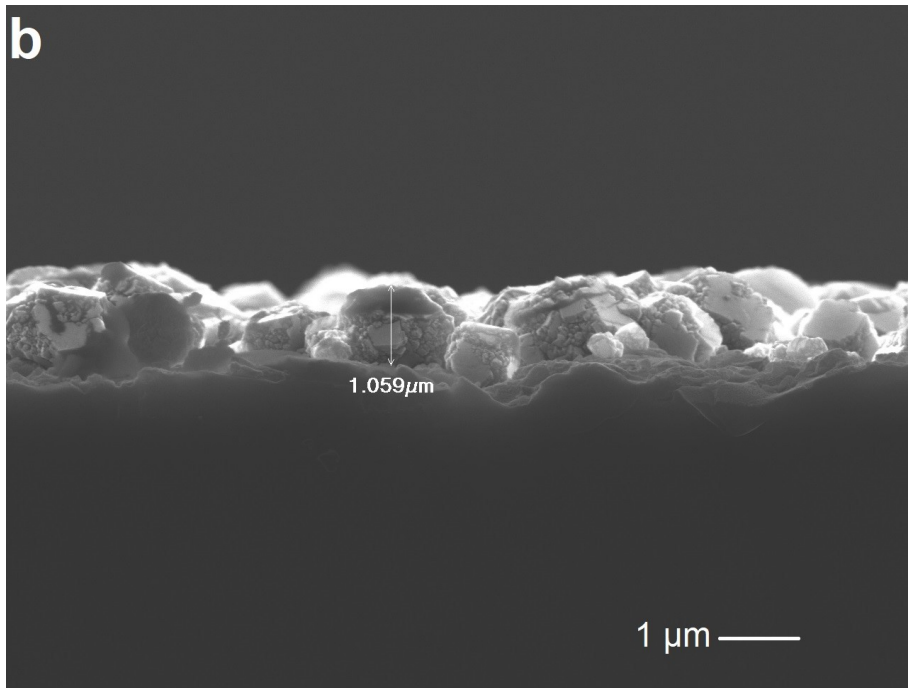

**Figure S3:** (a) surface and (b) fractured cross-sectional images of the carbon film deposited at 75 sccm total mass flow rate
